# Supplementary material for: Evidence for Enhanced Exosome Production in Aromatase Inhibitor-Resistant Breast Cancer Cells
Source: Int J Mol Sci. 2020 Aug 14;21(16):5841. doi: 10.3390/ijms21165841 (PMC7461508; doi:10.3390/ijms21165841)
Supplement: Supplementary file 1 [file ijms-21-05841-s001.pdf]

# Evidence for Enhanced Exosome Production in Aromatase Inhibitor-Resistant Breast Cancer Cells

Giuseppina Augimeri <sup>1,†</sup>, Giusi La Camera <sup>1,†</sup>, Luca Gelsomino <sup>1</sup>, Cinzia Giordano <sup>1,2</sup>, Salvatore Panza <sup>1</sup>, Diego Sisci <sup>1</sup>, Catia Morelli <sup>1</sup>, Balázs Győrffy <sup>3,4</sup>, Daniela Bonofiglio <sup>1,2</sup>, Sebastiano Andò <sup>1,2,‡</sup>, Ines Barone <sup>1,\*,‡</sup> and Stefania Catalano <sup>1,2,\*,‡</sup>

<sup>1</sup> Department of Pharmacy, Health and Nutritional Sciences, Via P Bucci, University of Calabria, 87036 Arcavacata di Rende (CS), Italy; giusy.augimeri@gmail.com (G.A.); giusylacamera93@gmail.com (G.L.C.); luca.gelsomino@unical.it (L.G.); cinzia.giordano@unical.it (C.G.); sasapanza@libero.it (S.P.); dsisci@unical.it (D.S.); catia.morelli@unical.it (C.M.); daniela.bonofiglio@unical.it (D.B.)

<sup>2</sup> Centro Sanitario, Via P Bucci, University of Calabria, 87036 Arcavacata di Rende (CS), Italy

<sup>3</sup> Bioinformatics and 2nd Department of Pediatrics, Semmelweis University, 1094 Budapest, Hungary; zsalab2@yahoo.com (B.G.)

<sup>4</sup> TTK Cancer Biomarker Research Group, 1117 Budapest, Hungary

\* Correspondence: ines.barone@unical.it (I.B.); stefania.catalano@unical.it (S.C.); Tel.: +39-0984-496216 (I.B.); +39-0984-496207 (S.C.)

† These authors contributed equally to this work.

‡ Joint senior author.

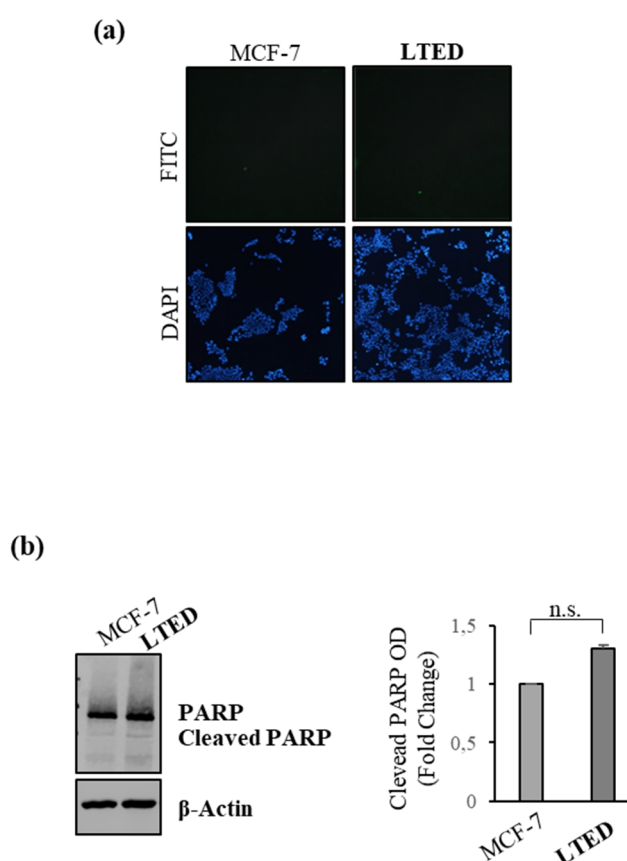

**Figure S1.** Evaluation of apoptosis in MCF-7 and MCF-7 LTED cells. (a) Terminal deoxynucleotidyl transferase-mediated dUTP nick end labeling (TUNEL) staining in MCF-7 and LTED cells in serum-free medium for 48h. DAPI was used for nuclear staining; (b) Immunoblot analysis of PARP and cleaved-PARP protein levels from total MCF-7 and LTED cellular extracts.  $\beta$ -Actin was used as a control for equal loading and transfer. The histograms represent the mean  $\pm$  SD of three separate experiments in which band intensities were evaluated in terms of optical density arbitrary units (OD) and expressed as fold over MCF-7 cells. n.s., nonsignificant.

**Table S1.** Oligonucleotide primers used in this study.

| Gene Symbol   | Gene Name                         | Primer Sequences                                                          |
|---------------|-----------------------------------|---------------------------------------------------------------------------|
| <i>RAB3D</i>  | Member RAS oncogene family RAB3D  | For 5'- TCAAGACCGTCTACCGCCAT -3'<br>Rev 5'- CTTGATTGCGTGGCCCAGTC -3'      |
| <i>RAB5A</i>  | Member RAS oncogene family RAB5A  | For 5'- CTAGTCGAGGCGCAACAAGA -3'<br>Rev 5'- GGGTTAGAAAAGCAGCCCCA -3'      |
| <i>RAB5B</i>  | Member RAS oncogene family RAB5B  | For 5'- CGGAGCCCCAGGAGTGTT -3'<br>Rev 5'- CACTGCAGATTCTCCCAGCA -3'        |
| <i>RAB6A</i>  | Member RAS oncogene family RAB6A  | For 5'- GCCCCGTGCAAATGTATCTGTG -3'<br>Rev 5'- GACCCGCAGTATCCACAG -3'      |
| <i>RAB7A</i>  | Member RAS oncogene family RAB7A  | For 5'- CCTCGAAAACAGACAAGTGGC -3'<br>Rev 5'- ATTCCGTGCAATCGTCTGGA -3'     |
| <i>RAB11A</i> | Member RAS oncogene family RAB11A | For 5'- ACGTCATCTCAGGGCAGTTC -3'<br>Rev 5'- GAGAAACAATGCGGTAAATCTCTGT -3' |
| <i>RAB12</i>  | Member RAS oncogene family RAB12  | For 5'- TCATCATTATCGGCTCCCCGC -3'<br>Rev 5'- TTGAAGTCAACACCCACGGT -3'     |
| <i>RAB14</i>  | Member RAS oncogene family RAB14  | For 5'- ACCATGGCAACTGCACCATA -3'<br>Rev 5'- TCCTACTCCCATGTCCCAAT -3'      |
| <i>RAB18</i>  | Member RAS oncogene family RAB18  | For 5'- ACTTGCAGCAACAATAGGTGT -3'<br>Rev 5'- TAACACCCTGTGCACCTCTA -3'     |
| <i>RAB21A</i> | Member RAS oncogene family RAB21A | For 5'- AACGACAAGCACATCACCAC -3'<br>Rev 5'- TCTTGACCTGCCGTATCCCAT -3'     |
| <i>RAB22A</i> | Member RAS oncogene family RAB22A | For 5'- TCAACCCAACAATAGGGGCA -3'<br>Rev 5'- ATTATAGCTGCAGCCGACCC -3'      |
| <i>RAB23</i>  | Member RAS oncogene family RAB23  | For 5'- TCCCGGGTTGTGCCTTACT -3'<br>Rev 5'- TCTTCCCTCTCAAATCGCTGGG -3'     |
| <i>RAB24</i>  | Member RAS oncogene family RAB24  | For 5'- GAGATCGGGGTTTGCCTCCC -3'<br>Rev 5'- CGGCCCCGATGGTGTTCT -3'        |
| <i>RAB27B</i> | Member RAS oncogene family RAB27B | For 5'- ATAAGTAGCTGTCCCGTGC -3'<br>Rev 5'- GATGGTCTTGGTCGGTCAGC -3'       |
| <i>RAB32</i>  | Member RAS oncogene family RAB32  | For 5'- CATCGCGGGGCAGGAG -3'<br>Rev 5'- AGAGGACAGCAGGGATAGGG -3'          |
